# Supplementary material
Source: Elsevier journal article supplement (https://www.sciencedirect.com/science/article/pii/S1885585716302134)

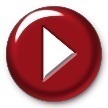
 **Supplementary material**

_____________________________________________________________________________________

**Accuracy of Area at Risk Quantification by Cardiac Magnetic Resonance According to the Myocardial Infarction Territory**

______________________________________________________________________________________


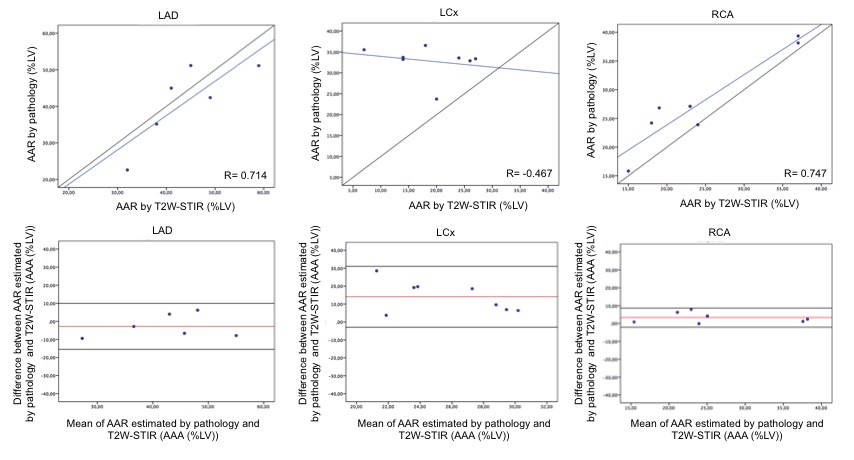

Supplement: mmc2 [file S1885585716302134:mmc2.docx]
